# Supplementary material
Source: Springer Nature journal article supplement (https://www.springermedizin.de/resource/supplementary/13034_2010_123_MOESM1_ESM.pdf/9652364)
Supplement: MOESM1 [file 9652364]

**CPT population 2005/2006**  
In- and outpatients  
n = 319

**Exclusions**  
n = 139

1) Munchausen Syndrome by proxy n = 1

2) Maltreatment disproved n = 25

3) Child deceased n = 4

4) Custodial parent not confronted n = 56

5) Parent with violent behavior at CPT confrontation n = 1

6) Recurrent referral n = 1

7) Domiciled outside Switzerland n = 6

8) Older than 16.5 years n = 45

**Study sample**  
N = 180

**Non-participants**  
n = 99

**Participants**  
n = 81

No contact established  
n = 49

Participation refused  
n = 50

No reason / neg. experience  
n = 22

Fear of new confrontation with maltreatment  
n = 10

Too time-consuming  
n = 18

Complete participation  
n = 42

Telephone interview  
n = 39
